# Supplementary material for: Acceptability of COVID-19 Vaccination among Health Care Workers in Ghana
Source: Hindawi journal article supplement (doi:10.1155/2021/9998176), 2021-04-16
Supplement: f1 [file 9998176.f1.docx]

**Acceptability of COVID-19 vaccination among health workers in Ghana**

Health workers are a high-risk group to contract COVID-19 due to their interactions with patients, hence vaccination against COVID-19 has been identified as a key strategy to protect them. This study seeks to examine the COVID-19 experience, perception of the fight against COVID-19, and acceptance of COVID-19 vaccine among health workers in Ghana. This is purely for research purposes and that your participation is voluntary and your anonymity is assured.

Thank you for agreeing to participate in this survey.

1. What is your age?
2. < 20
3. 20 – 29
4. 30 – 39
5. 40 – 49
6. 50 – 59
7. 60 and above
8. What is your sex?
9. Male
10. Female
11. What is your religious affiliation?
12. Christian
13. Islam
14. Traditionalist
15. No Religion
16. Other (specify):­­­­­­­­­­­­­­­­­­­­­­­­­­________________
17. What is your highest level of schooling you are attending now/attended in the past?
18. No certificate
19. Certificate
20. Diploma
21. First degree
22. Postgraduate
23. Category of health worker

Community health nurse

State registered nurse

Midwife

Dispensing technician/pharmacy

Allied health worker

Laboratory worker

- 1. Medical doctor
  2. Physician assistant
  3. Other (specify):________________

____________

1. What is your current marital status?
2. Never married
3. Informal/living together
4. Married
5. Separated
6. Divorced
7. Widowed
8. Place of residence:
9. Urban
10. Rural
11. In general, would you say that you/your household has:
12. More money than you need
13. Just enough money
14. Less money than you need
15. Apart from the immunization schedule for children, have you ever received any vaccination?
16. Yes
17. No
18. If Yes, what type of vaccination did you receive? ______________________________
19. Do you have any chronic illness?
20. Yes
21. No
22. 3. Don’t know

**COVID-19 experience**

1. Have you been previously in contact with COVID-19 positive patient?
2. Yes
3. No
4. Has a member of your household been diagnosed with COVID-19?
5. Yes
6. No
7. Has any one of your relatives been diagnosed with COVID-?
8. Yes
9. No
10. Don’t Know
11. Has any one of your friends or neighbours been diagnosed with COVID-?
12. Yes
13. No
14. Don’t know
15. Have you been tested for COVID-19?
16. Yes
17. No
18. If Yes, what was the result of the test?
19. Positive
20. Negative
21. Don’t Know / I did not receive the result
22. What is your chance of getting COVID-19?
23. Small
24. Moderate
25. Great
26. No risk at all

**Kindly indicate the extent to which you agree or disagree with each statement on social trust in the fight against Covid-19 Pandemic**

|  |  | **Strongly disagree** | **Disagree** | **Partially agree** | **Agree** | **Strongly agree** |
| --- | --- | --- | --- | --- | --- | --- |
|  | I trust in the authorities in the fight against Covid-19 |  |  |  |  |  |
|  | I trust in the information provided by media in the fight against Covid-19 |  |  |  |  |  |
|  | I trust in our health system and hospitals in the fight against Covid-19 |  |  |  |  |  |
|  | I trust in the accuracy of the measures taken by the government in the fight against Covid-19 |  |  |  |  |  |
|  | I trust in the correct implementation of the measures in the fight against Covid-19 |  |  |  |  |  |
|  | I trust in the appropriateness of the economic measures taken with respect to Covid-19 |  |  |  |  |  |
|  | I think that we are more successful than the Western countries in the fight against Covid-19 |  |  |  |  |  |
|  | I think that Covid-19 pandemic will lose its effect with sunshine |  |  |  |  |  |
|  | Covid-19 has showed that the countries deemed to be powerful are not that powerful |  |  |  |  |  |

**Intention to vaccinate**

1. Have you heard about the intended COVID-19 vaccination for health workers in Ghana?
2. Yes
3. No
4. If an approved COVID-19 vaccine became available, would you take it yourself?
5. Yes
6. No
7. If No, what is the main reason for your unwillingness to receive COVID-19 vaccine?
8. Inadequate data about the safety of the new vaccine
9. A concern on adverse effects of the vaccine
10. A concern on vaccine being ineffective
11. Prior adverse reaction to any vaccine
12. I am against vaccines in general
13. A concern of acquiring COVID-19 infection from the vaccine itself
14. I perceive myself not to be at considerable risk of developing complications if I am infected with COVID-19
15. I perceive myself not at elevated risk to acquire COVID-19 infection
16. I already had COVID-19 infection
17. Vaccine administration is painful or inconvenient
18. Other (specify)___________________________
19. Are there any personal concerns in relation to COVID 19?

_____________________________________________________________________________

**Thank you**
